# Supplementary material
Source: PubMed Central journal article supplement (PMC5118185)
Supplement: NIHMS821195-supplement-Supp_info.pdf [file NIHMS821195-supplement-Supp_info.pdf]

## Supporting Information

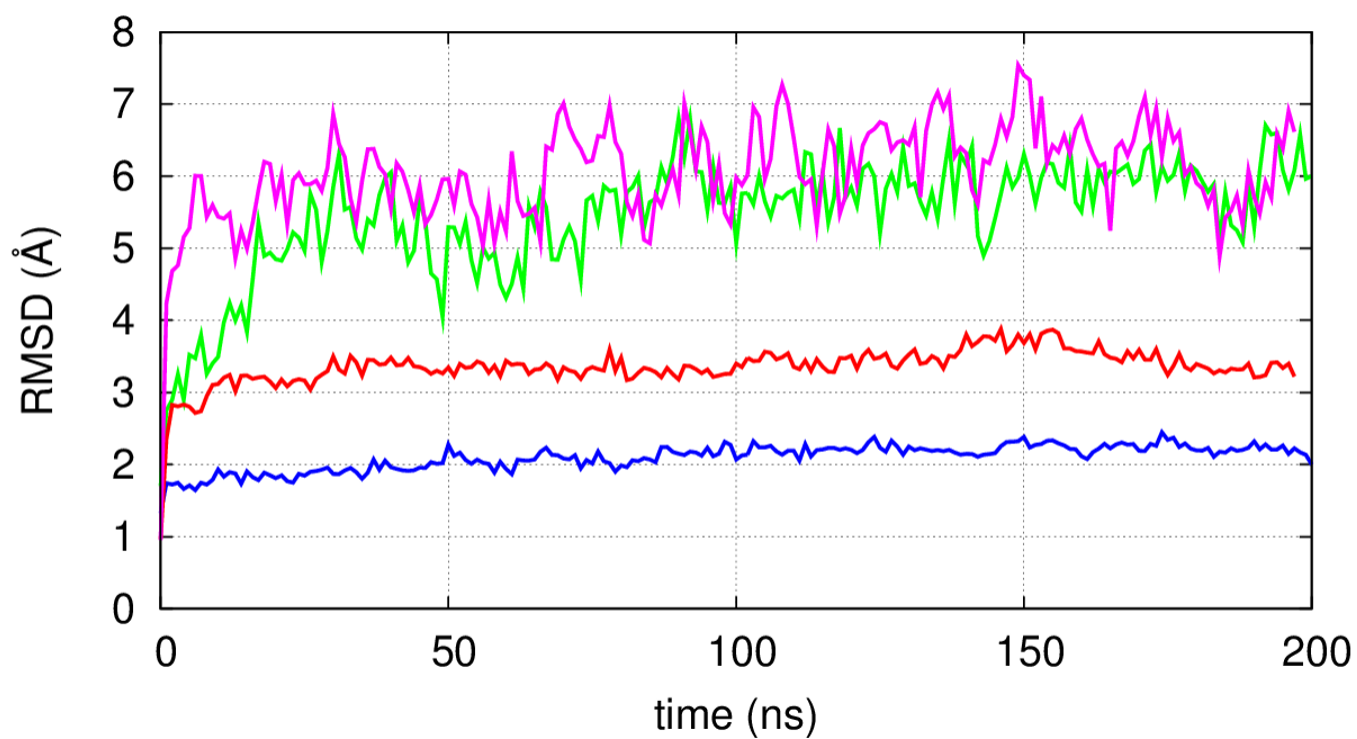

**Figure S1.** RMSD as a function of time for two representative MD trajectories in the C state at 30°C and the O state at 60°C using the following color scheme: expanded TMD in the C state (blue) and the O state (red), entire TRPV1 in the C state (green) and the O state (purple).

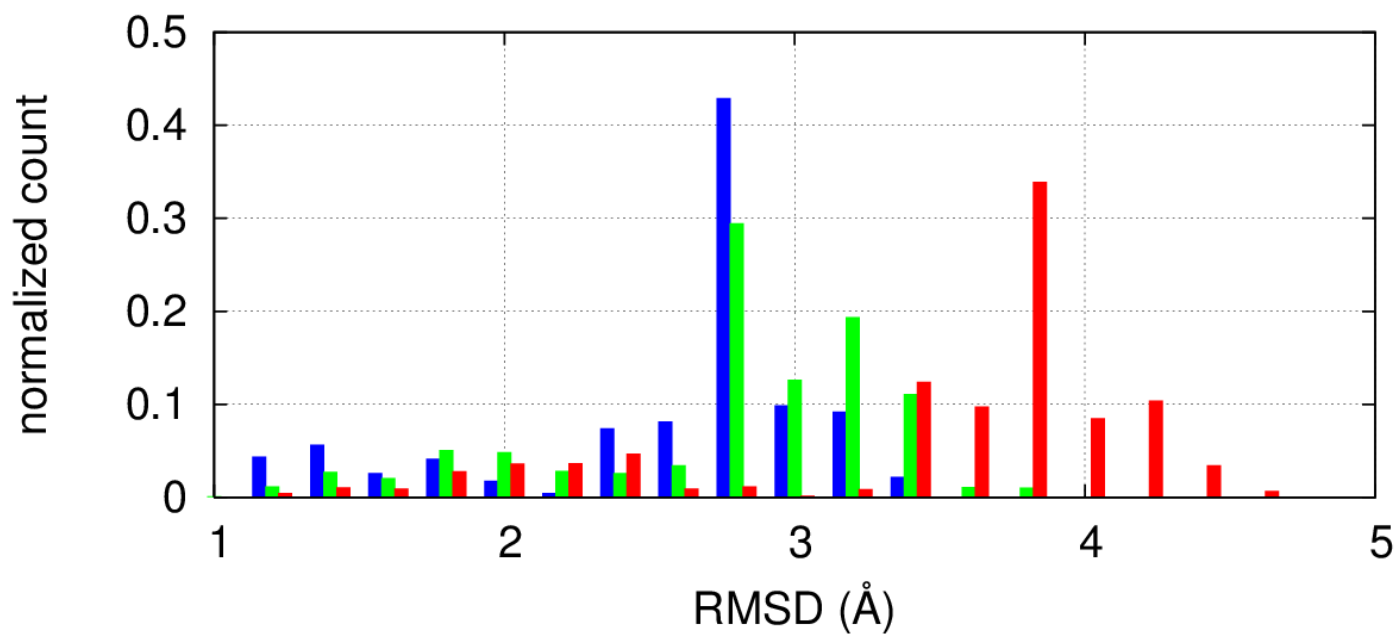

**Figure S2.** Distribution of all-to-all RMSD in the expanded TMD (blue: the C state at 30°C, green: the heated C state at 60°C, red: the O state at 60°C). The O-state distribution is shifted toward higher RMSD relative to the C-state distribution, suggesting a higher conformational diversity.

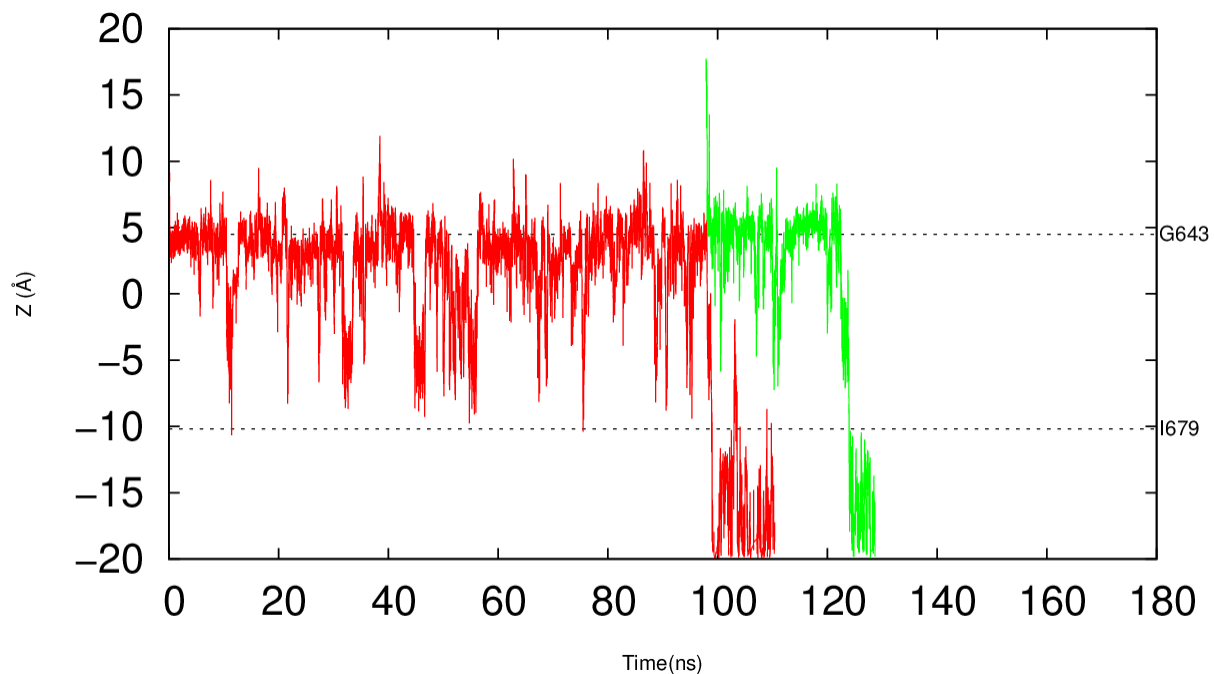

**a**

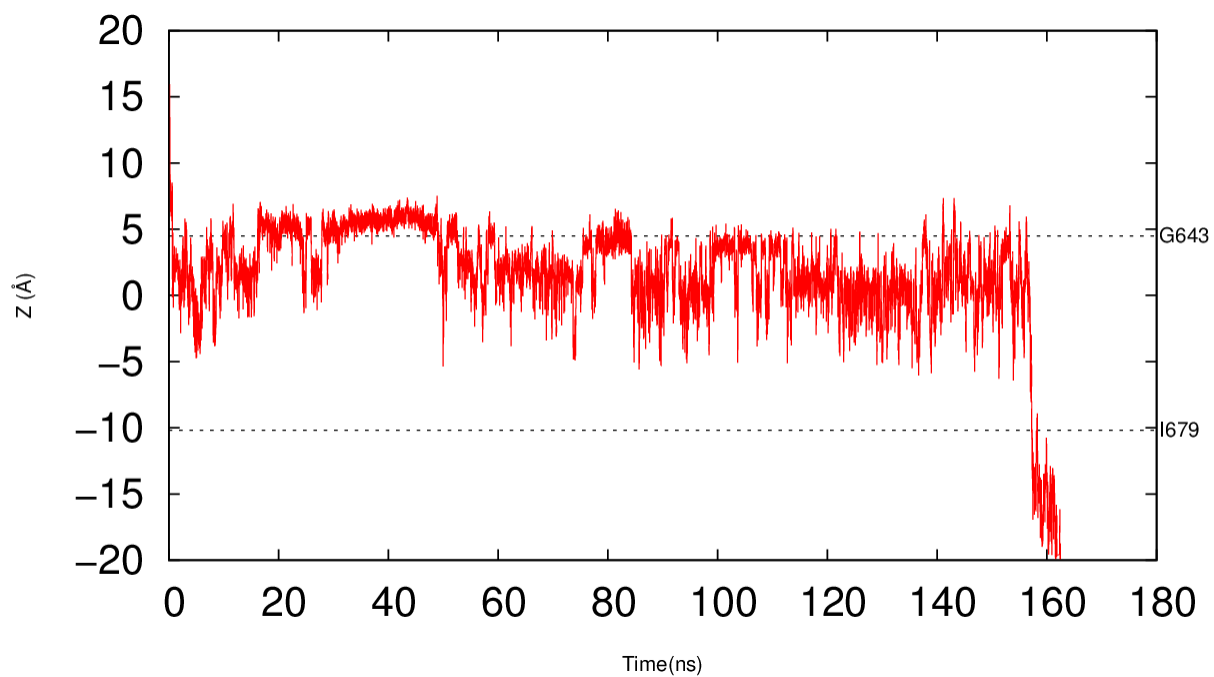

**b**

**Figure S3.** Three ion conduction events observed in two trajectories in the O state at 60°C: The Z coordinate gives the position of a conducting  $K^+$  ion along the channel pore axis. The horizontal dashed lines mark the Z coordinates of the upper gate (at G643) and the lower gate (at I679). Two and one conduction events were shown in (a) and (b), respectively.

**Movie S1.** Bottom view of the conformational changes predicted by the first PCA mode (same color coding as Fig 1a). For clarify, only part of the ARDs, the MPD linkers, the S2-S3 linkers, the lower S6 helices, and the TRP helices are shown. Residues R409, E692, and I679 are shown as spheres.

**Movie S2.** Side view of the conformational changes predicted by the first PCA mode (same color coding as Fig 1a). Only the MPD linkers, the S2-S3 linkers, the pore domain, and the TRP helices are shown in two diagonally opposing subunits. Residues R409, E692, G643, and I679 are shown as spheres.
